# Supplementary material for: Neighborhood-Level Redlining and Lending Bias Are Associated with Breast Cancer Mortality in a Large and Diverse Metropolitan Area
Source: Oxford University Press journal article supplement (doi:10.1158/1055-9965.epi-20-1038), 2020-10-02

**Figure S4:** Directed acyclic graph (DAG) to identify potential confounders for the association between lending bias and breast cancer mortality.


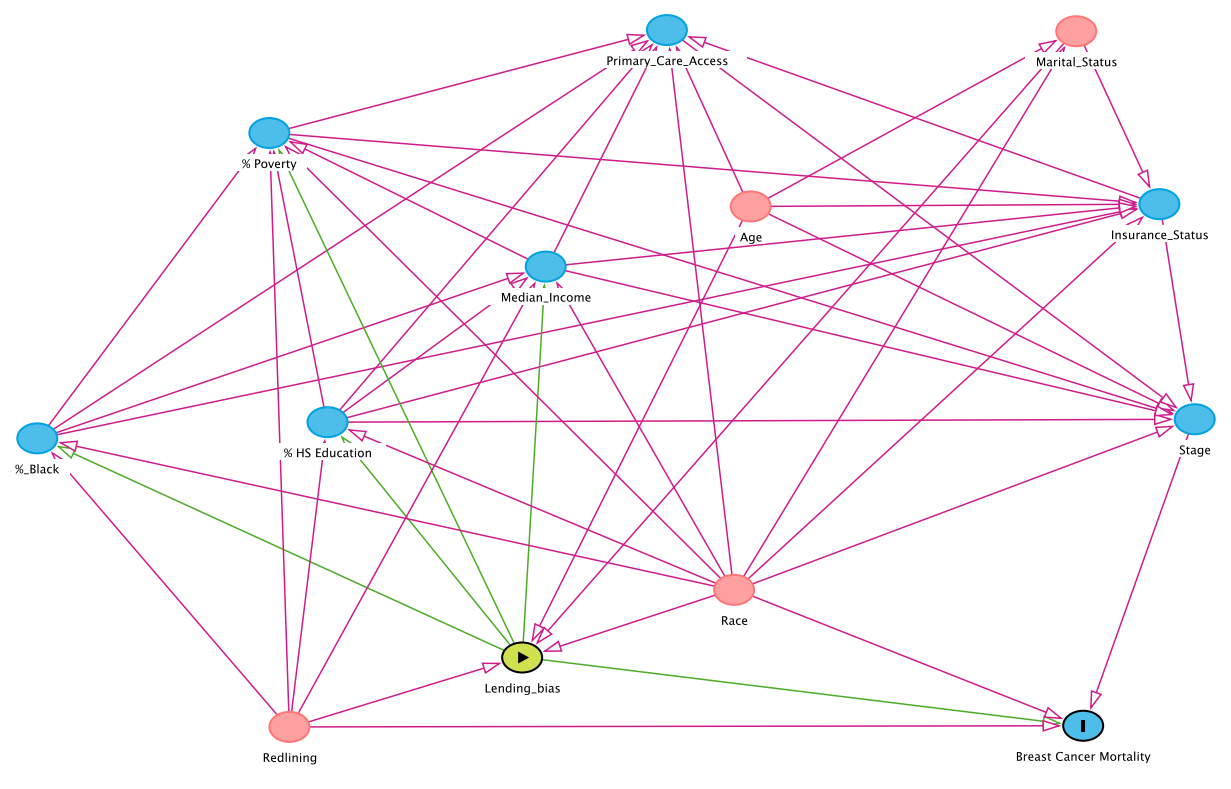

Supplement: 10559965epi201038-sup-246932_2_supp_6580834_qgrrtr.docx [file 10559965epi201038-sup-246932_2_supp_6580834_qgrrtr.docx]
