# Supplementary material for: Neighborhood-Level Redlining and Lending Bias Are Associated with Breast Cancer Mortality in a Large and Diverse Metropolitan Area
Source: Oxford University Press journal article supplement (doi:10.1158/1055-9965.epi-20-1038), 2020-10-02
Supplement: 10559965epi201038-sup-246932_2_supp_6580835_qgrrtr.docx [file 10559965epi201038-sup-246932_2_supp_6580835_qgrrtr.docx]

| **Supplementary Table S1.** Patient demographic, clinicopathological, and treatment characteristics among 8523 non-Hispanic White (NHW) and Black (NHB) women diagnosed with stage I-IV breast cancer in metro-Atlanta between 2010–2014 and registered with the Georgia Cancer Registry. | | | | |
| --- | --- | --- | --- | --- |
|
|  | **NHW  (N=4943)** | | **NHB  (N=3580)** | |
|  | **Median** | **SD** | **Median** | **SD** |
| **Age at Diagnosis (years)** | 60.00 | 13.25 | 56.00 | 12.97 |
| **Length of Follow-up (months)** | 44.60 | 20.56 | 42.00 | 20.75 |
| **Time to event (months)** | 23.33 | 18.37 | 20.87 | 16.87 |
|  | **Median** | **IQR** | **Median** | **IQR** |
| **Lending Bias** | 3.36 | 2.34, 4.47 | 1.66 | 1.05, 3.05 |
| **Redlining** | 0.67 | 0.50, 0.93 | 2.32 | 1.22, 3.15 |
|  | **N** | **%*** | **N** | **%*** |
| **Lending Bias** |  |  |  |  |
| ≥3 | 2931 | 59 | 912 | 25 |
| *<3* | 2012 | 41 | 2668 | 75 |
| **Redlining** |  |  |  |  |
| ≥1 | 1012 | 20 | 2859 | 80 |
| *<1* | 3931 | 80 | 721 | 20 |
| **Breast Cancer-Specific Death** | 319 | 6.5 | 488 | 14 |
| **Age** |  |  |  |  |
| <55 | 1807 | 37 | 1632 | 46 |
| ≥55 | 3136 | 63 | 1948 | 54 |
| **Stage** |  |  |  |  |
| I | 2727 | 55 | 1397 | 39 |
| II | 1537 | 31 | 1341 | 37 |
| III | 444 | 9.0 | 505 | 14 |
| IV | 235 | 4.8 | 337 | 9.4 |
| **Tumor Grade** |  |  |  |  |
| 1 | 1313 | 27 | 476 | 13 |
| 2 | 2052 | 42 | 1275 | 36 |
| 3+ | 1344 | 27 | 1608 | 45 |
| Unknown | 234 | 4.7 | 221 | 6.2 |
| **Tumor size (cm)** |  |  |  |  |
| ≤0.5 | 564 | 11 | 305 | 8.5 |
| 0.6–1 | 869 | 18 | 427 | 12 |
| >1 to <5 | 3085 | 62 | 2237 | 62 |
| ≥5 | 356 | 7.2 | 522 | 15 |
| Unknown | 69 | 1.4 | 89 | 2.5 |
| **Lymph Node** |  |  |  |  |
| Node negative | 3181 | 64.35 | 1899 | 53 |
| Node positive | 1307 | 26.44 | 1175 | 33 |
| *1*–*3* | 904 | 18.29 | 715 | 20 |
| *≥4* | 279 | 5.64 | 254 | 7.1 |
| *Unknown number* | 124 | 2.52 | 206 | 5.8 |
| No nodes examined | 450 | 9.10 | 494 | 14 |
| Unknown node status | 5 | 0.10 | 12 | 0.4 |
| **Estrogen Receptor Status** |  |  |  |  |
| ER− tumor | 640 | 13 | 912 | 25 |
| ER+ tumor | 4248 | 86 | 2614 | 73 |
| Unknown/Borderline | 55 | 1.1 | 54 | 1.5 |
| **Molecular Subtype** |  |  |  |  |
| HR+/HER2− (Luminal A) | 3511 | 71 | 2074 | 58 |
| HR+/HER2+ (Luminal B) | 525 | 11 | 432 | 12 |
| HR-/HER2+ (HER2 Overexpressing) | 172 | 3.5 | 185 | 5.2 |
| HR-/HER2− (Triple Negative) | 401 | 8.1 | 646 | 18 |
| Unknown | 334 | 6.8 | 243 | 6.8 |
| **Marital Status** |  |  |  |  |
| Single | 615 | 12 | 1109 | 31 |
| Married (common law and unmarried domestic) | 3025 | 61 | 1258 | 35 |
| Divorced | 547 | 11 | 596 | 17 |
| Widowed | 590 | 12 | 383 | 11 |
| Separated | 23 | 0.5 | 64 | 1.8 |
| Unknown | 143 | 2.9 | 170 | 4.8 |
| **Insurance Type** |  |  |  |  |
| Uninsured | 57 | 1.2 | 144 | 4.0 |
| Private | 3101 | 63 | 1953 | 55 |
| Medicaid | 139 | 2.8 | 516 | 14 |
| Medicare | 1545 | 31 | 844 | 24 |
| Military/Other** | 39 | 0.8 | 65 | 1.8 |
| Unknown | 62 | 1.3 | 58 | 1.6 |
| **ACS Socio-ecologic Variables** | | | | |
| **Percent Black** |  | |  | |
| ≥50% | 507 | 10 | 2540 | 71 |
| <50% | 4436 | 90 | 1040 | 29 |
| **Percent Poverty** |  | |  | |
| ≥20% | 647 | 13 | 1678 | 47 |
| <20% | 4296 | 87 | 1901 | 53 |
| **Percent less than Highschool Education** |  | |  | |
| ≥20% | 327 | 6.6 | 708 | 20 |
| <20% | 4616 | 93 | 2872 | 80 |
| **Medium Household Income** |  | |  | |
| <$44,311 | 500 | 10 | 1589 | 44 |
| $44,311- < $61,403 | 914 | 18 | 1215 | 34 |
| $61,403 - <$84,497 | 1589 | 32 | 572 | 16 |
| ≥ $84,497 | 1940 | 39 | 204 | 5.7 |
