# Supplementary material for: Neighborhood-Level Redlining and Lending Bias Are Associated with Breast Cancer Mortality in a Large and Diverse Metropolitan Area
Source: Oxford University Press journal article supplement (doi:10.1158/1055-9965.epi-20-1038), 2020-10-02
Supplement: 10559965epi201038-sup-246932_2_supp_6580837_qgrrtr.docx [file 10559965epi201038-sup-246932_2_supp_6580837_qgrrtr.docx]

| **Supplementary Table S2**: Distribution of stage among women residing in census tracts only contributing non-Hispanic black (NHB) cases and those only contributing non-Hispanic white (NHW) cases compared to the larger cohort distribution | | | | | | | | | |
| --- | --- | --- | --- | --- | --- | --- | --- | --- | --- |
|  | NHB women residing in census tracts (CT) contributing only NHB cases, n=943 | | NHW women residing in CT contributing only NHW cases, n=929 | | Women residing in CT contributing both NHB and NHW cases, n=6556 | | **Larger Cohort Distribution** | | |
| **Stage** | **Count** | **%** | **Count** | **%** | **Count** | **%** | **NHB** | **NHW** | **Total** |
| I | 368 | 39 | 542 | 58 | 3164 | 48 | 39 | 55 | 48 |
| II | 349 | 37 | 296 | 32 | 2208 | 34 | 37 | 31 | 34 |
| III | 132 | 14 | 64 | 6.9 | 740 | 11 | 14 | 9.0 | 11 |
| IV | 94 | 10 | 27 | 2.9 | 444 | 6.8 | 9.4 | 4.8 | 6.7 |
